# Supplementary material
Source: Springer Nature journal article supplement (https://www.springermedizin.de/resource/supplementary/12916_2012_690_MOESM2_ESM.pdf/9598328)
Supplement: MOESM2 [file 9598328]

294 records identified  
through database search

3 identified through citation  
search

247 records after duplicates  
removed

70 records screened

177 records  
excluded

27 full text articles  
assessed for eligibility

43 full text articles  
excluded as did not  
meet inclusion criteria

14 studies included in  
qualitative synthesis

14 studies included in  
quantitative synthesis (meta-  
analysis)
